# Supplementary material for: Markers of Inflammation, Tissue Damage, and Fibrosis in Individuals Diagnosed with Human Immunodeficiency Virus and Pneumonia: A Cohort Study
Source: MDPI journal article supplement (doi:10.3390/pathogens13010084), 2024-01-18
Supplement: s1 [file s1]

## Supplementary material

**Table S1.** Concentration of cytokines/chemokines measured in the plasma samples of the HIV and CAP group (n=17) and the HIV group (n=7) at study baseline.

| <i>Cytokines/<br/>Chemokines</i>                              | Study groups                 |                     | <i>p-value*</i> |
|---------------------------------------------------------------|------------------------------|---------------------|-----------------|
|                                                               | HIV and CAP                  | HIV                 |                 |
|                                                               | <i>Baseline median (IQR)</i> |                     |                 |
| IL-6                                                          | 3.371(2.683-4.155)           | 0.992(0.340-2.146)  | 0.000*          |
| IL-8                                                          | 2.193(1.795-3.258)           | 1.478(1.249-1.897)  | 0.004*          |
| IL-10                                                         | 1.647(1.184-2.777)           | 0.262(0.262-1.206)  | 0.002*          |
| IL-13                                                         | 2.270(1.163-3.665)           | 1.416(1.163-3.333)  | 0.695           |
| IL-17A                                                        | 1.746(0.691-2.088)           | 1.280(0.779-1.860)  | 0.569           |
| IL-1Ra/IL1                                                    | 1.850(1.192-3.270)           | 0.562(0.393-1.366)  | 0.001*          |
| IP10/ CXCL10                                                  | 6.832(6.257-8.993)           | 6.100(5.311-6.898)  | 0.010*          |
| MCP1/ CCL2                                                    | 6.537(5.795-7.147)           | 5.944(5.575-6.221)  | 0.039*          |
| MIP-1 $\alpha$ /CCL3                                          | 2.211(0.556-3.423)           | 1.676(0.405-2.664)  | 0.214           |
| MIP-1 $\beta$ /CCL4                                           | 3.843(3.612-4.046)           | 3.597(3.373-3.861)  | 0.043*          |
| PAI1                                                          | 8.595(8.374-8.945)           | 8.561(8.297-8.901)  | 0.491           |
| sCD14                                                         | 2.543(2.344-2.723)           | 2.456(2.3747-2.621) | 0.427           |
|                                                               | <i>Baseline mean (SD)</i>    |                     | <i>p-value*</i> |
| IL-1 $\beta$ <sup>a</sup>                                     | 2.123(1.405)                 | 2.065(1.284)        | 0.223           |
| IL-18 <sup>a</sup>                                            | 5.427(1.175)                 | 3.780(0.780)        | 0.024*          |
| CCL11/eotaxin <sup>a</sup>                                    | 5.219 (0.766)                | 5.403(0.469)        | 0.485           |
| VEGF/ VPF <sup>a</sup>                                        | 3.235(0.977)                 | 2.418(1.431)        | 0.108           |
| RANTES/CCL5 <sup>a</sup>                                      | 7.172(0.632)                 | 7.423(0.527)        | 0.154           |
| Molecule concentration: pg/ml                                 |                              |                     |                 |
| Mann Whitney U test                                           |                              |                     |                 |
| Student t-test <sup>a</sup>                                   |                              |                     |                 |
| <b>*Statistically significant if <math>p &lt; 0.05</math></b> |                              |                     |                 |
| HIV: human immunodeficiency virus                             |                              |                     |                 |
| CAP: community acquired pneumonia                             |                              |                     |                 |

**Table S2.** Indices for lung Function test measured using portable spirometry for HIV and CAP group and HIV group at the time of hospital baseline.

| Lung function variables                    | Groups             |              | p-value* |
|--------------------------------------------|--------------------|--------------|----------|
|                                            | HIV and CAP group  | HIV group    |          |
|                                            | Baseline mean (SD) |              |          |
| FEF25                                      | 4.609(3.360)       | 7.438(2.403) | 0.015*   |
| FEF2575                                    | 2.476(1.962)       | 3.823(1.439) | 0.042*   |
| FEV1/FVC                                   | 0.815(0.160)       | 0.842(0.063) | 0.567    |
| FEV1                                       | 2.132(1.269)       | 3.291(0.842) | 0.008*   |
| Spirometric variables expressed in liters. |                    |              |          |
| Student t-test                             |                    |              |          |
| *Statistically significant if $p < 0.05$   |                    |              |          |
| HIV: human immunodeficiency virus          |                    |              |          |
| CAP: community acquired pneumonia          |                    |              |          |

**Table S3.** Correlations Between the Concentration of cytokines/chemokines with non-normal distribution measured at baseline with lung Function Test Indices (FEV1) in the HIV and CAP group).

| Molecules measured in plasma | HIV and CAP Group       |         |                         |         |                         |         |                         |               |
|------------------------------|-------------------------|---------|-------------------------|---------|-------------------------|---------|-------------------------|---------------|
|                              | FEF25                   |         | FEF25-75                |         | FEV1/FVC                |         | FEV1                    |               |
|                              | Correlation coefficient | P value       |
| IL-6                         | -0.154                  | 0.616   | -0.071                  | 0.817   | -0.093                  | 0.762   | -0.198                  | 0.517         |
| IL-8                         | 0.126                   | 0.681   | -0.110                  | 0.721   | 0.203                   | 0.505   | -0.236                  | 0.437         |
| IL-10                        | 0.385                   | 0.194   | 0.374                   | 0.209   | 0.385                   | 0.194   | 0.176                   | 0.566         |
| IL-13                        | -0.1                    | 0.746   | -0.290                  | 0.336   | 0.396                   | 0.181   | -0.296                  | 0.326         |
| IL-17A                       | -0.291                  | 0.334   | -0.324                  | 0.280   | 0.456                   | 0.117   | -0.544                  | <b>0.055*</b> |
| IL-1Ra/IL1                   | -0.313                  | 0.297   | -0.324                  | 0.280   | 0.077                   | 0.803   | -0.445                  | 0.128         |
| IP10/ CXCL10                 | -0.115                  | 0.707   | 0.016                   | 0.957   | -0.467                  | 0.108   | -0.011                  | 0.972         |
| MCP1/ CCL2                   | -0.099                  | 0.748   | -0.143                  | 0.642   | -0.005                  | 0.986   | -0.203                  | 0.505         |
| MIP-1 $\alpha$ /CCL3         | -0.459                  | 0.115   | -0.381                  | 0.199   | 0.061                   | 0.844   | -0.464                  | 0.110         |
| MIP-1 $\beta$ /CCL4          | -0.368                  | 0.216   | -0.242                  | 0.426   | 0.099                   | 0.748   | -0.291                  | 0.334         |
| PAI1                         | 0.022                   | 0.943   | 0.088                   | 0.775   | 0.258                   | 0.394   | -0.038                  | 0.901         |
| sCD14                        | -0.385                  | 0.194   | -0.165                  | 0.590   | -0.214                  | 0.482   | -0.104                  | 0.734         |

Molecule concentration: pg/ml  
 Spearman's Rho Correlation  
 \*Statistically significant if  $p < 0.05$   
 HIV: human immunodeficiency virus  
 CAP: community acquired pneumonia

**Table S4.** Correlations Between the Concentration of cytokines/chemokines with normal distribution measured at baseline with lung Function Test Indices (FEV1/FVC) in the HIV and CAP group.

| Molecules measured in plasma | HIV and CAP Group       |         |                         |         |                         |               |                         |         |
|------------------------------|-------------------------|---------|-------------------------|---------|-------------------------|---------------|-------------------------|---------|
|                              | FEF25                   |         | FEF25-75                |         | FEV1/FVC                |               | FEV1                    |         |
|                              | Correlation coefficient | P value | Correlation coefficient | P value | Correlation coefficient | P value       | Correlation coefficient | P value |
| IL-1 $\beta$                 | -0.152                  | 0.620   | -0.096                  | 0.755   | 0.615                   | <b>0.025*</b> | -0.293                  | 0.331   |
| IL-18                        | 0.279                   | 0.355   | 0.069                   | 0.822   | 0.174                   | 0.570         | 0.056                   | 0.856   |
| CCL11/eotaxin                | -0.028                  | 0.927   | 0.085                   | 0.781   | 0.049                   | 0.874         | -0.053                  | 0.863   |
| VEGF/ VPF                    | 0.139                   | 0.650   | 0.241                   | 0.428   | 0.593                   | <b>0.033*</b> | 0.098                   | 0.749   |
| RANTES/CCL5                  | 0.268                   | 0.376   | 0.366                   | 0.218   | 0.522                   | 0.067         | 0.243                   | 0.425   |

Molecule concentration: pg/ml

Pearson's correlation coefficient

\*Statistically significant if  $p < 0.05$

HIV: human immunodeficiency virus

CAP: community acquired pneumonia



**Table S5.** Correlations between the concentration of cytokines/chemokines with non-normal distribution measured at baseline with lung Function Test Indices (FEF25, FEF25-75, FEV1/FVC and FEV1) in the HIV group.

| Molecules measured in plasma | HIV Group               |               |                         |               |                         |               |                         |               |
|------------------------------|-------------------------|---------------|-------------------------|---------------|-------------------------|---------------|-------------------------|---------------|
|                              | FEF25                   |               | FEF25-75                |               | FEV11/FVC               |               | FEV1                    |               |
|                              | Correlation coefficient | P value       |
| IL6                          | -0.290                  | 0.170         | -0.270                  | 0.201         | -0.330                  | 0.115         | -0.335                  | 0.110         |
| IL8                          | -0.080                  | 0.712         | 0.019                   | 0.929         | -0.045                  | 0.834         | -0.096                  | 0.655         |
| IL10                         | -0.710                  | <b>0.000*</b> | -0.428                  | <b>0.037*</b> | -0.218                  | 0.307         | -0.525                  | <b>0.008*</b> |
| IL13                         | 0.180                   | 0.400         | 0.201                   | 0.346         | 0.070                   | 0.744         | 0.218                   | 0.307         |
| IL17A                        | 0.067                   | 0.755         | 0.154                   | 0.473         | 0.122                   | 0.571         | 0.048                   | 0.822         |
| IL-1Ra/IL1                   | -0.333                  | 0.111         | -0.293                  | 0.164         | -0.330                  | 0.115         | -0.260                  | 0.219         |
| IP10/ CXCL10                 | -0.422                  | <b>0.040*</b> | -0.402                  | <b>0.052*</b> | -0.357                  | 0.087         | -0.541                  | <b>0.006*</b> |
| MCP1/ CCL2                   | -0.153                  | 0.475         | -0.054                  | 0.802         | 0.038                   | 0.859         | -0.065                  | 0.762         |
| MIP-1 $\alpha$ /CCL3         | 0.049                   | 0.819         | 0.002                   | 0.992         | 0.054                   | 0.803         | -0.049                  | 0.819         |
| MIP-1 $\beta$ /CCL4          | 0.028                   | 0.897         | -0.006                  | 0.977         | -0.086                  | 0.689         | 0.182                   | 0.394         |
| PAI1                         | -0.003                  | 0.990         | -0.110                  | 0.607         | -0.019                  | 0.929         | -0.205                  | 0.336         |
| sCD14                        | -0.149                  | 0.488         | -0.398                  | <b>0.054*</b> | -0.406                  | <b>0.049*</b> | -0.506                  | <b>0.012*</b> |

Molecule concentration: pg/ml  
Spearman's Rho Correlation  
\*Statistically significant if p < 0.05  
HIV: human immunodeficiency virus  
CAP: community acquired pneumonia

**Table S6.** Correlation between the cytokines/chemokines concentration and forced vital capacity (FVC).

| Molecules measured in plasma             | FVC                     |               |
|------------------------------------------|-------------------------|---------------|
|                                          | Correlation coefficient | P value       |
| IL6                                      | -0.471                  | <b>0.003*</b> |
| IL8                                      | -0.389                  | <b>0.017*</b> |
| IL10                                     | -0.524                  | <b>0.001*</b> |
| IL13                                     | -0.003                  | 0.984         |
| IL17A                                    | -0.315                  | <b>0.058*</b> |
| IL-1Ra/IL1                               | -0.431                  | <b>0.008*</b> |
| IP10/ CXCL10                             | -0.403                  | <b>0.013*</b> |
| MCP1/ CCL2                               | -0.249                  | 0.138         |
| MIP-1 $\alpha$ /CCL3                     | -0.243                  | 0.147         |
| MIP-1 $\beta$ /CCL4                      | -0.154                  | 0.363         |
| PAI1                                     | -0.176                  | 0.298         |
| sCD14                                    | -0.276                  | 0.098         |
| Spearman's Rho Correlation               |                         |               |
| *Statistically significant if $p < 0.05$ |                         |               |

| HIV and CAP group                        |                         |              |
|------------------------------------------|-------------------------|--------------|
|                                          | CVF                     |              |
| Molecules measured in plasma             | Correlation coefficient | P value      |
| IL6                                      | -0.247                  | 0.415        |
| IL8                                      | -0.434                  | 0.138        |
| IL10                                     | -0.055                  | 0.859        |
| IL13                                     | -0.362                  | 0.224        |
| IL17A                                    | -0.714                  | <b>0.006</b> |
| IL-1Ra/IL1                               | -0.478                  | 0.098        |
| IP10/ CXCL10                             | -0.022                  | 0.943        |
| MCP1/ CCL2                               | -0.192                  | 0.529        |
| MIP-1 $\alpha$ /CCL3                     | -0.508                  | 0.076        |
| MIP-1 $\beta$ /CCL4                      | -0.511                  | 0.074        |
| PAI1                                     | -0.055                  | 0.859        |
| sCD14                                    | -0.033                  | 0.915        |
| Spearman's Rho Correlation               |                         |              |
| *Statistically significant if $p < 0.05$ |                         |              |

| HIV and CAP group                        |                         |         |
|------------------------------------------|-------------------------|---------|
|                                          | CVF                     |         |
| Molecules measured in plasma             | Correlation coefficient | P value |
| IL1 $\beta$                              | -0.534                  | 0.060   |
| IL18                                     | -0.093                  | 0.762   |
| CCL11/eotaxin                            | -0.050                  | 0.870   |
| VEGF/ VPF                                | -0.157                  | 0.610   |
| RANTES/CCL5                              | -0.008                  | 0.980   |
| Pearson's correlation coefficient        |                         |         |
| *Statistically significant if $p < 0.05$ |                         |         |



| HIV group                                |                         |              |
|------------------------------------------|-------------------------|--------------|
|                                          | CVF                     |              |
| Molecules measured in plasma             | Correlation coefficient | P value      |
| IL6                                      | -0.219                  | 0.304        |
| IL8                                      | -0.042                  | 0.845        |
| IL10                                     | -0.550                  | <b>0.005</b> |
| IL13                                     | 0.330                   | 0.115        |
| IL17A                                    | 0.017                   | 0.939        |
| IL-1Ra/IL1                               | -0.201                  | 0.347        |
| IP10/ CXCL10                             | -0.471                  | <b>0.020</b> |
| MCP1/ CCL2                               | -0.048                  | 0.824        |
| MIP-1 $\alpha$ /CCL3                     | -0.047                  | 0.829        |
| MIP-1 $\beta$ /CCL4                      | 0.248                   | 0.243        |
| PAI1                                     | -0.189                  | 0.377        |
| sCD14                                    | -0.431                  | <b>0.035</b> |
| Spearman's Rho Correlation               |                         |              |
| *Statistically significant if $p < 0.05$ |                         |              |

| HIV group                                |                         |         |
|------------------------------------------|-------------------------|---------|
|                                          | CVF                     |         |
| Molecules measured in plasma             | Correlation coefficient | P value |
| IL1 $\beta$                              | 0.153                   | 0.475   |
| IL18                                     | -0.132                  | 0.540   |
| CCL11/eotaxin                            | 0.269                   | 0.205   |
| VEGF/ VPF                                | 0.013                   | 0.954   |
| RANTES/CCL5                              | -0.074                  | 0.730   |
| Pearson's correlation coefficient        |                         |         |
| *Statistically significant if $p < 0.05$ |                         |         |
